# Supplementary material
Source: PubMed Central journal article supplement (PMC6675559)
Supplement: jciinsight-4-125652-s233.pdf [file jciinsight-4-125652-s233.pdf]

**Supplemental Table 1.** List of primers used for quantitative PCR (h=human, m=mouse)

| <b>Gene name</b>       | <b>Sequence</b>                                               |
|------------------------|---------------------------------------------------------------|
| h- $\alpha$ SMA        | FW 5-CTATGAGGGCTATGCCTTGCC-3<br>RV 5-GCTCAGCAGTAGTAACGAAGGA-3 |
| h-CollagenI $\alpha$ 1 | FW 5-GAGGGCCAAGACGAAGACATC-3<br>RV 5-CAGATCACGTCATCGCACAAAC-3 |
| h-TIMP-1               | FW 5-CTTCTGCAATTCCGACCTCGT-3<br>RV 5-ACGCTGGTATAAGGTGGTCTG-3  |
| h-Cyclin D1            | FW 5-CAATGACCCCGCACGATTC-3<br>RV 5-CATGGAGGGCGGATTGGAA-3      |
| m- $\alpha$ SMA        | FW 5-GTCCCAGACATCAGGGAGTAA-3<br>RV 5- TCGGATACTTCAGCGTCAGGA-3 |
| m-CollagenI $\alpha$ 1 | FW 5-GCTCCTCTTAGGGGCCACT-3<br>RV 5-CCACGTCTCACCATTGGGG-3      |
| m-TIMP-1               | FW 5-CTTGGTTCCCTGGCGTACTC-3<br>RV 5-ACCTGATCCGTCCACAAACAG-3   |
